# Supplementary material for: Combination of explainable machine learning and conceptual density functional theory: applications for the study of key solvation mechanisms
Source: Royal Society of Chemistry journal article supplement (doi:10.1039/d2cp04428e), 2022-01-01
Supplement: d2cp04428e1.pdf [file d2cp04428e1.pdf]

# Combination of Explainable Machine Learning and Conceptual Density Functional Theory: Applications for the Study of Key Solvation Mechanisms

I-Ting Ho, Milena Matysik, Liliana Montano Herrera, Jiyoung Yang, Ralph  
Joachim Guderlei, Michael Laussegger, Bernhard Schrantz, Regine Hammer,  
Ramón Alain Miranda-Quintana, and Jens Smiatek\*

E-mail: [jens.smiatek@boehringer-ingenelheim.com](mailto:jens.smiatek@boehringer-ingenelheim.com)

# Correlation Coefficients - Numerical Values

|                         | $\Delta E_{CS}$ | $\Delta E_{AS}$ | $\Delta E_{CA}$ | $\Delta\Delta E_{sol}$ | $\Sigma\Delta E_{ASCS}$ | $\Delta\Delta E_{ASCS}$ | $E_{HOMO}^S$ | $E_{LUMO}^S$ | $\chi_S$ | $\eta_S$ | $E_{HOMO}^C$ | $E_{LUMO}^C$ | $\chi_C$ | $\eta_C$ | $E_{HOMO}^A$ | $E_{LUMO}^A$ | $\chi_A$ | $\eta_A$ |
|-------------------------|-----------------|-----------------|-----------------|------------------------|-------------------------|-------------------------|--------------|--------------|----------|----------|--------------|--------------|----------|----------|--------------|--------------|----------|----------|
| $\Delta E_{CS}$         | 1.00            | 0.02            | 0.63            | -0.40                  | 0.99                    | -0.99                   | -0.13        | -0.13        | 0.13     | 0.12     | 0.99         | 0.82         | -0.99    | -0.99    | -0.03        | -0.06        | 0.05     | -0.03    |
| $\Delta E_{AS}$         | 0.02            | 1.00            | 0.71            | -0.82                  | 0.18                    | 0.14                    | 0.23         | 0.14         | -0.19    | -0.32    | 0.05         | 0.07         | -0.05    | -0.05    | -0.88        | -0.77        | 0.93     | -0.02    |
| $\Delta E_{CA}$         | 0.63            | 0.71            | 1.00            | -0.97                  | 0.73                    | -0.51                   | 0.01         | -0.01        | -0.00    | -0.04    | 0.63         | 0.57         | -0.63    | -0.62    | -0.64        | -0.70        | 0.76     | -0.17    |
| $\Delta\Delta E_{sol}$  | -0.40           | -0.82           | -0.97           | 1.00                   | -0.53                   | 0.27                    | -0.05        | -0.02        | 0.04     | 0.07     | -0.41        | -0.40        | 0.41     | 0.40     | 0.73         | 0.80         | -0.87    | 0.20     |
| $\Sigma\Delta E_{ASCS}$ | 0.99            | 0.18            | 0.73            | -0.53                  | 1.00                    | -0.95                   | -0.09        | -0.10        | 0.10     | 0.07     | 0.99         | 0.82         | -0.99    | -0.98    | -0.17        | -0.18        | 0.20     | -0.03    |
| $\Delta\Delta E_{ASCS}$ | -0.99           | 0.14            | -0.51           | 0.27                   | -0.95                   | 1.00                    | 0.17         | 0.15         | -0.16    | -0.17    | -0.98        | -0.80        | 0.98     | 0.97     | -0.11        | -0.06        | 0.10     | 0.03     |
| $E_{HOMO}^S$            | -0.13           | 0.23            | 0.01            | -0.05                  | -0.09                   | 0.17                    | 1.00         | 0.96         | -0.99    | -0.91    | -0.07        | -0.11        | 0.08     | 0.07     | -0.05        | -0.07        | 0.07     | -0.03    |
| $E_{LUMO}^S$            | -0.13           | 0.14            | -0.01           | -0.02                  | -0.10                   | 0.15                    | 0.96         | 1.00         | -0.98    | -0.75    | -0.09        | -0.12        | 0.10     | 0.09     | -0.04        | -0.06        | 0.06     | -0.02    |
| $\chi_S$                | 0.13            | -0.19           | -0.00           | 0.04                   | 0.10                    | -0.16                   | -0.99        | -0.98        | 1.00     | 0.86     | 0.08         | 0.12         | -0.09    | -0.08    | 0.05         | 0.07         | -0.06    | 0.03     |
| $\eta_S$                | 0.12            | -0.32           | -0.04           | 0.07                   | 0.07                    | -0.17                   | -0.91        | -0.75        | 0.86     | 1.00     | 0.03         | 0.07         | -0.03    | -0.03    | 0.05         | 0.08         | -0.07    | 0.04     |
| $E_{HOMO}^C$            | 0.99            | 0.05            | 0.63            | -0.41                  | 0.99                    | -0.98                   | -0.07        | -0.09        | 0.08     | 0.03     | 1.00         | 0.79         | -1.00    | -1.00    | -0.04        | -0.06        | 0.05     | -0.03    |
| $E_{LUMO}^C$            | 0.82            | 0.07            | 0.57            | -0.40                  | 0.82                    | -0.80                   | -0.11        | -0.12        | 0.12     | 0.07     | 0.79         | 1.00         | -0.81    | -0.76    | -0.06        | -0.10        | 0.09     | -0.06    |
| $\chi_C$                | -0.99           | -0.05           | -0.63           | 0.41                   | -0.99                   | 0.98                    | 0.08         | 0.10         | -0.09    | -0.03    | -1.00        | -0.81        | 1.00     | 1.00     | 0.04         | 0.06         | -0.06    | 0.03     |
| $\eta_C$                | -0.99           | -0.05           | -0.62           | 0.40                   | -0.98                   | 0.97                    | 0.07         | 0.09         | -0.08    | -0.03    | -1.00        | -0.76        | 1.00     | 1.00     | 0.03         | 0.05         | -0.05    | 0.03     |
| $E_{HOMO}^A$            | -0.03           | -0.88           | -0.64           | 0.73                   | -0.17                   | -0.11                   | -0.05        | -0.04        | 0.05     | 0.05     | -0.04        | -0.06        | 0.04     | 0.03     | 1.00         | 0.54         | -0.86    | -0.35    |
| $E_{LUMO}^A$            | -0.06           | -0.77           | -0.70           | 0.80                   | -0.18                   | -0.06                   | -0.07        | -0.06        | 0.07     | 0.08     | -0.06        | -0.10        | 0.06     | 0.05     | 0.54         | 1.00         | -0.90    | 0.60     |
| $\chi_A$                | 0.05            | 0.93            | 0.76            | -0.87                  | 0.20                    | 0.10                    | 0.07         | 0.06         | -0.06    | -0.07    | 0.05         | 0.09         | -0.06    | -0.05    | -0.86        | -0.90        | 1.00     | -0.19    |
| $\eta_A$                | -0.03           | -0.02           | -0.17           | 0.20                   | -0.03                   | 0.03                    | -0.03        | -0.02        | 0.03     | 0.04     | -0.03        | -0.06        | 0.03     | 0.03     | -0.35        | 0.60         | -0.19    | 1.00     |

Figure 1: Correlation coefficients for feature set.

# Correlation Coefficients - Heatmap

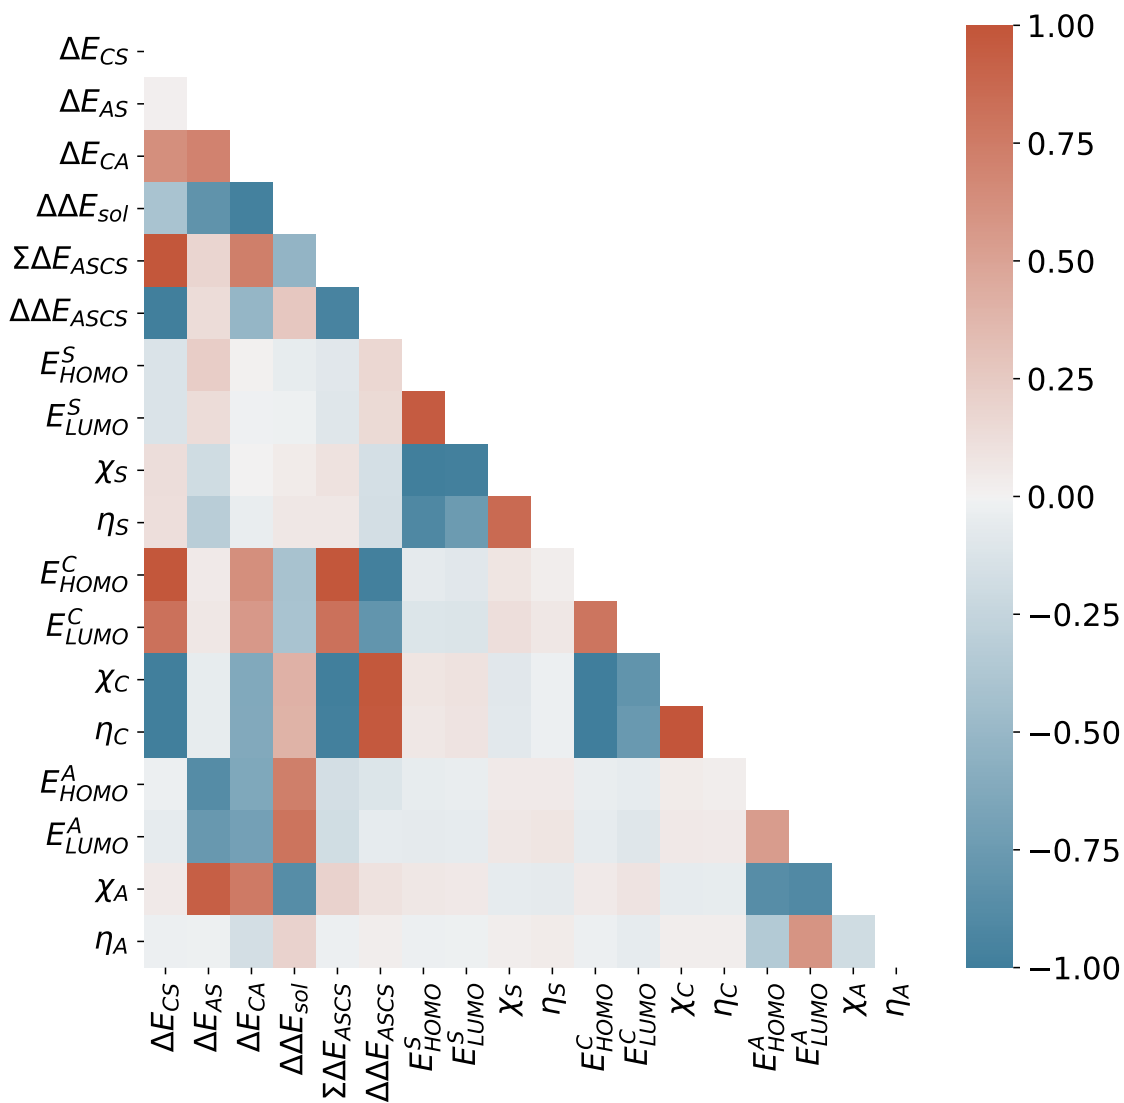

Figure 2: Correlation coefficients for feature set as heatmap.

# Free Energy Calculations - Reduced XGB Model

Goodness of fit plot

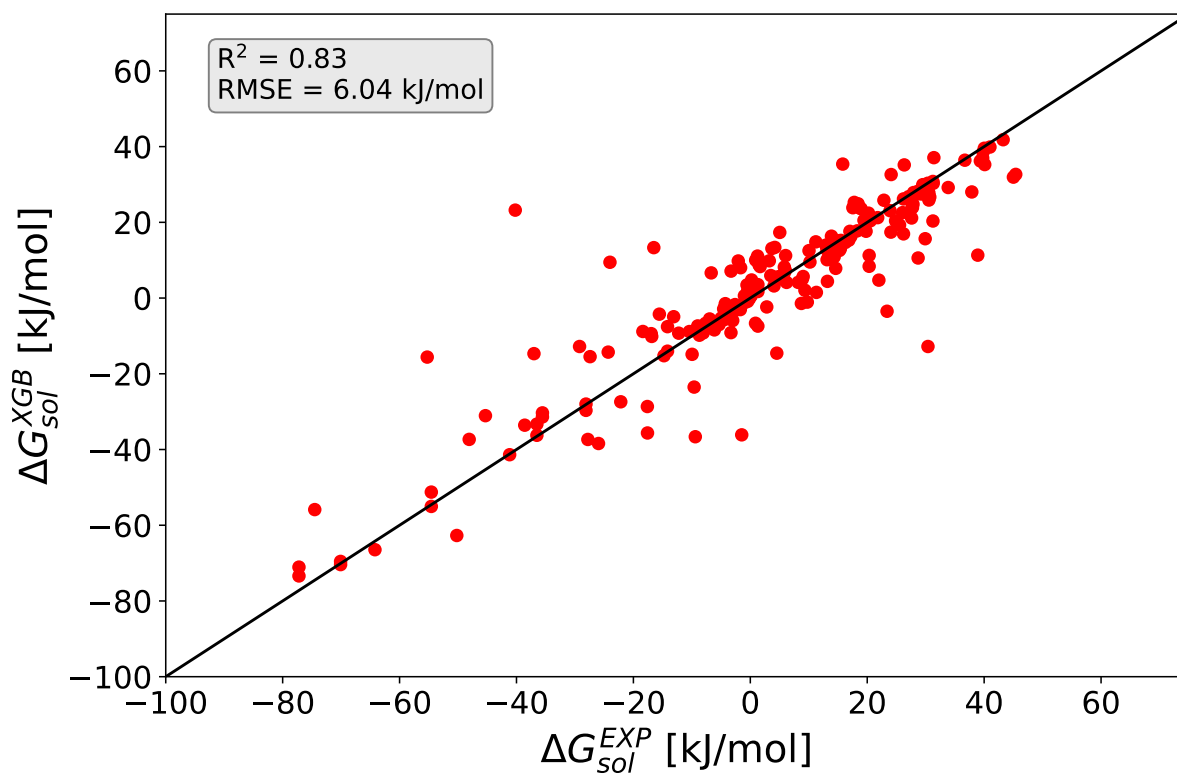

Figure 3: Goodness of fit plots for predicted (subscript XGB) and experimental values (subscript EXP) for  $\Delta G_{sol}$  regarding the reduced XGB model. The straight black lines highlight a full coincidence.

## SHAP analysis

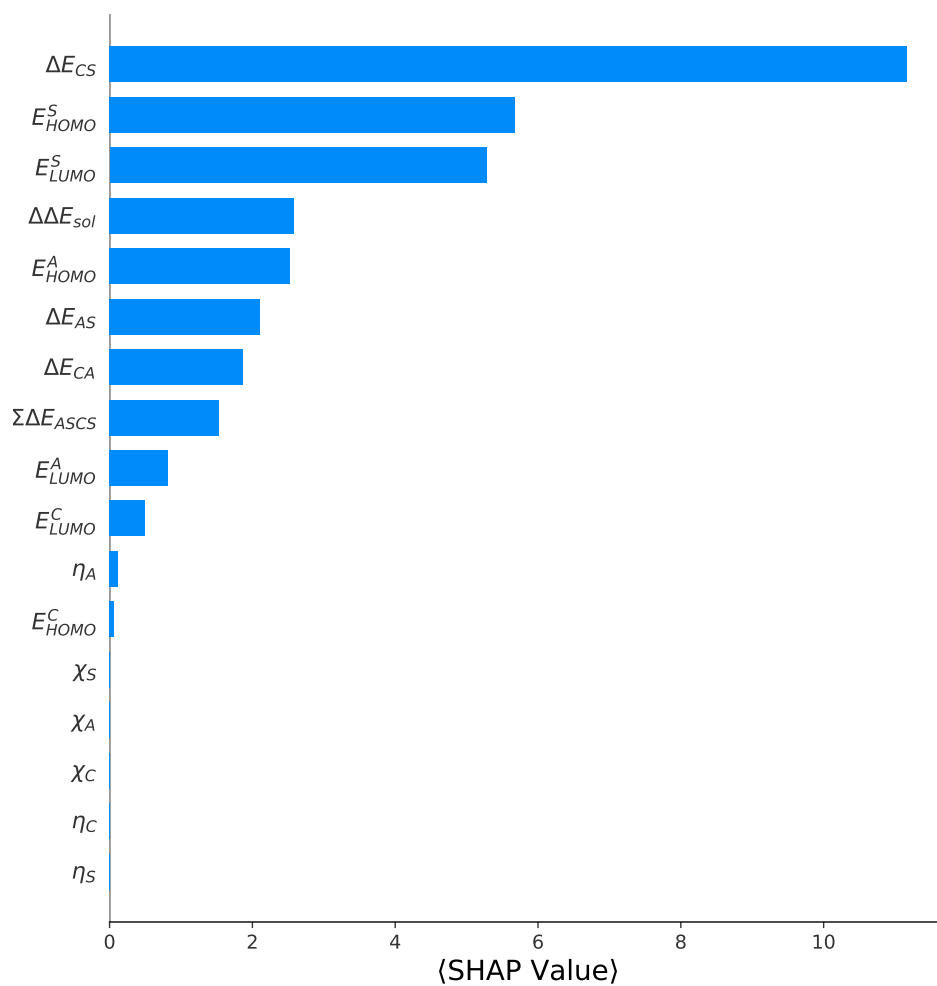

Figure 4: Net SHAP values for feature ranking of the reduced XGB model for the prediction of  $\Delta G_{sol}$ .

# Free Enthalpy Calculations - Reduced XGB Model

Goodness of fit plot

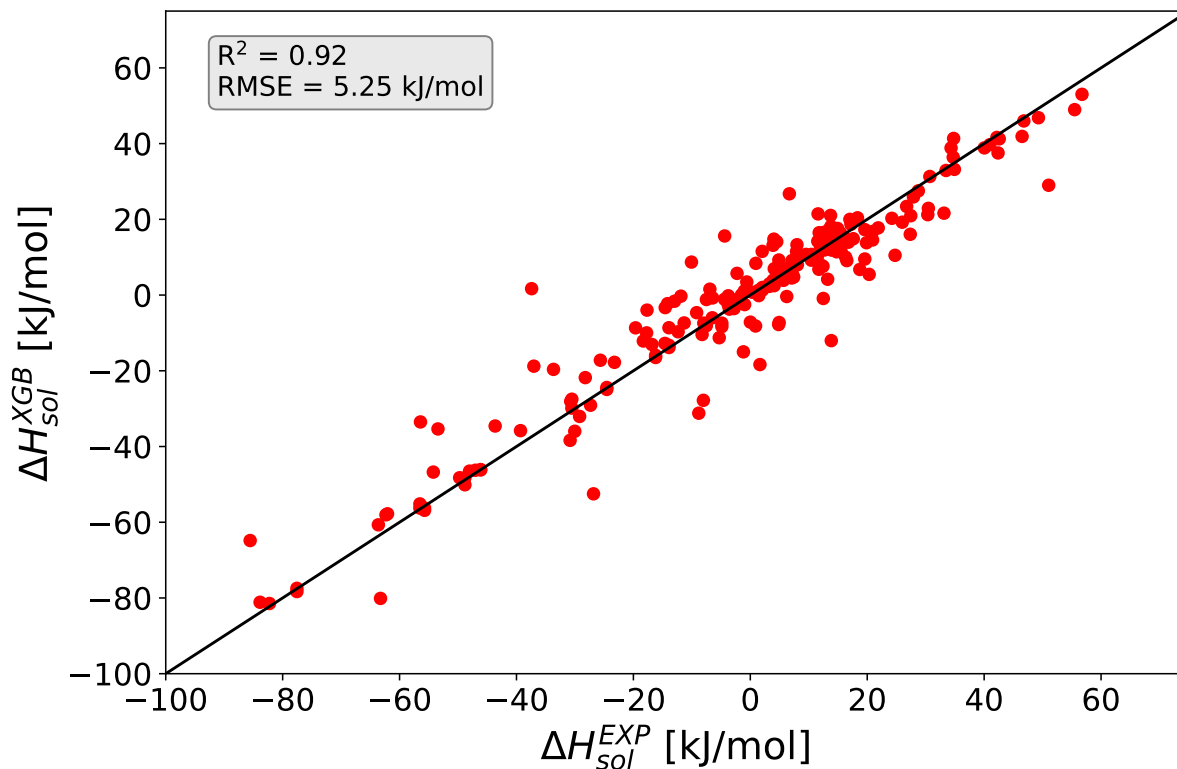

Figure 5: Goodness of fit plots for predicted (subscript XGB) and experimental values (subscript EXP) for  $\Delta H_{sol}$  regarding the reduced XGB model. The straight black lines highlight a full coincidence.

## SHAP analysis

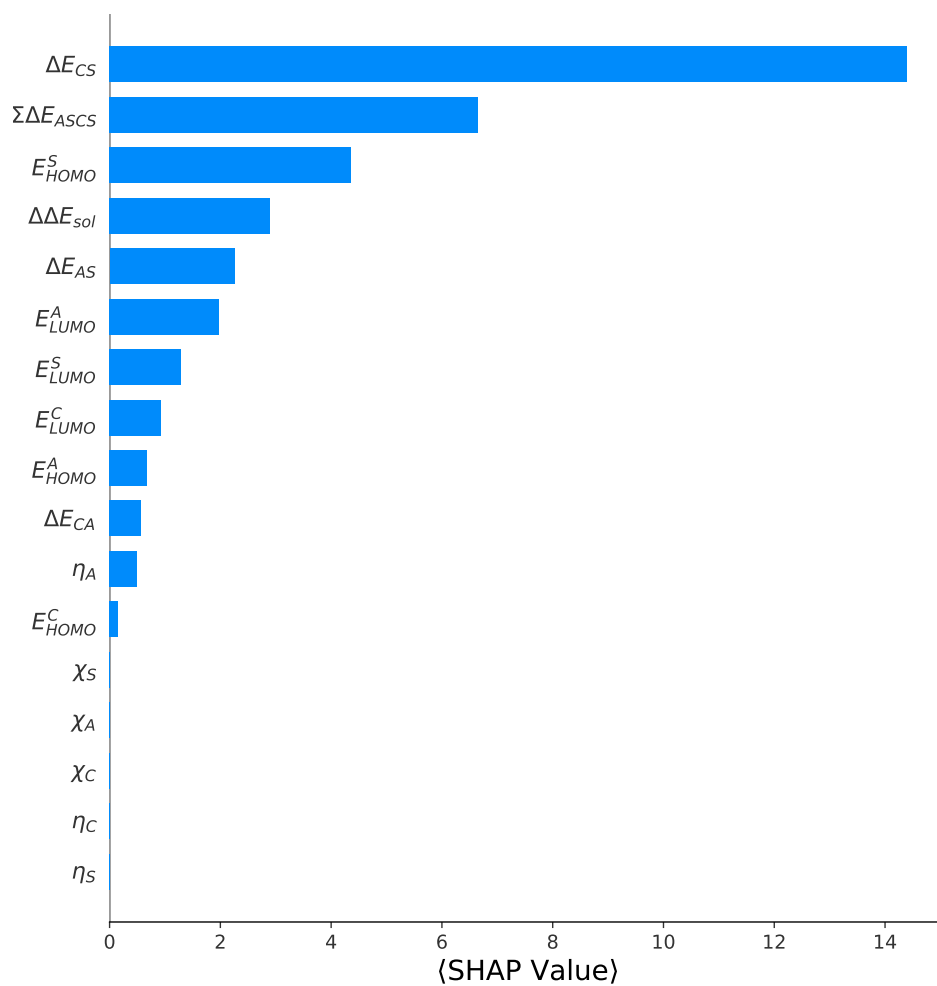

Figure 6: Net SHAP values for feature ranking of the reduced XGB model for the prediction of  $\Delta H_{sol}$ .

# Free Entropy Calculations - Reduced ET Model

Goodness of fit plot

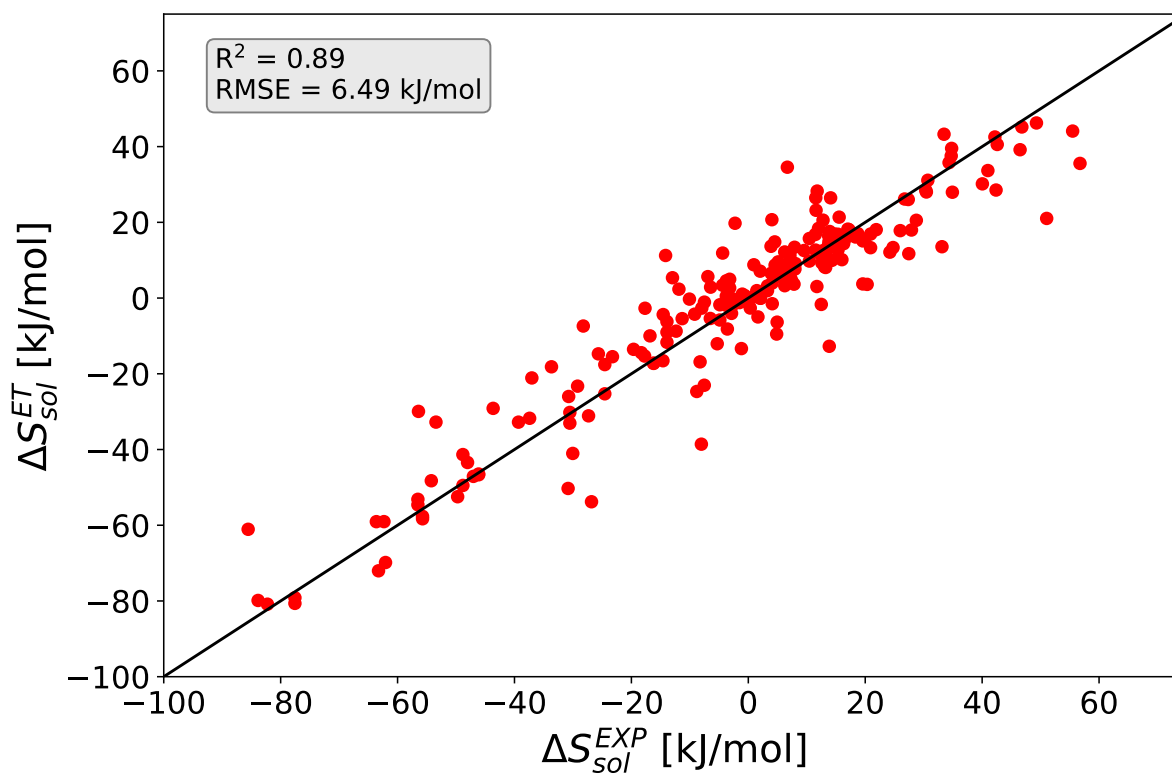

Figure 7: Goodness of fit plots for predicted (subscript XGB) and experimental values (subscript EXP) for  $\Delta S_{sol}$  regarding the reduced ET model. The straight black lines highlight a full coincidence.



## SHAP analysis

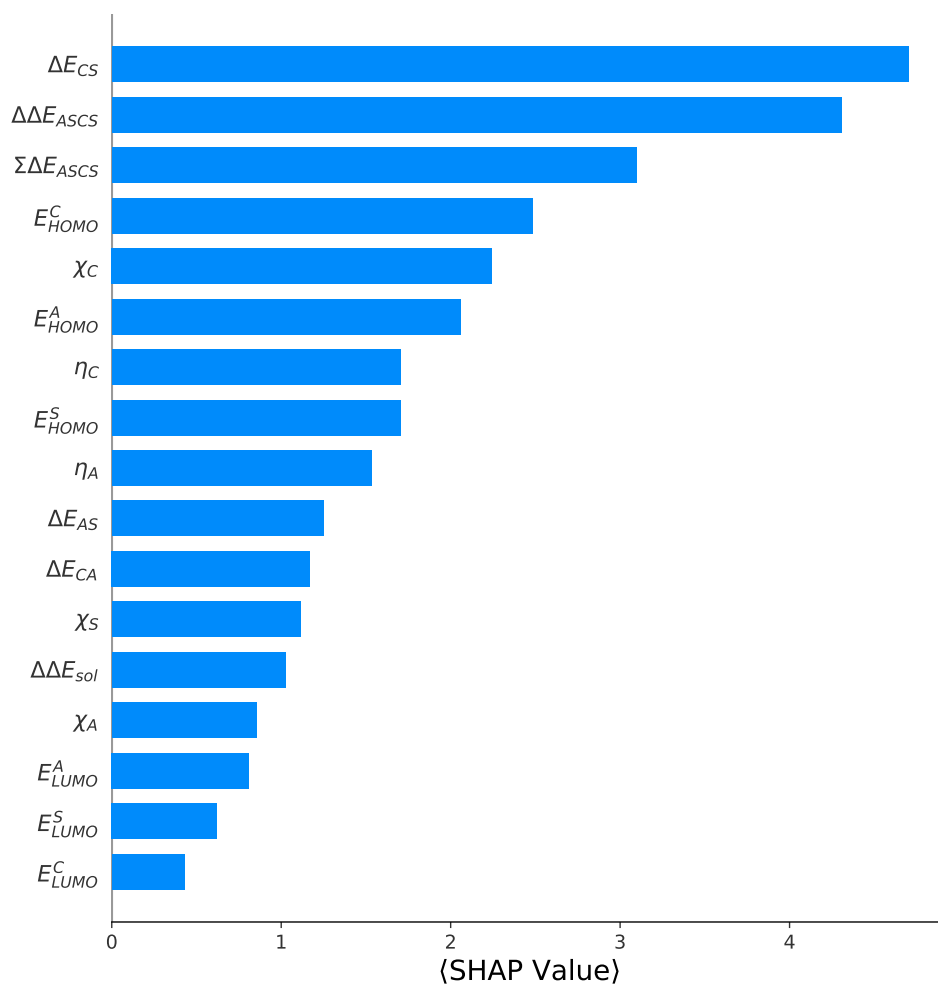

Figure 8: Net SHAP values for feature ranking of the reduced ET model for the prediction of  $\Delta S_{sol}$ .
